# Supplementary material
Source: HighWire-hosted journal article supplement (https://ez-admanager.com/highwire/filestream/135626/field_highwire_adjunct_files/0/gidal.pdf)
Supplement: gidal.pdf [file gidal.pdf]

# Eficacia y tolerabilidad de perampanel con DAE inductoras enzimáticas en pacientes con epilepsia

Barry E. Gidal, PharmD  
Antonio Laurenza, MD  
Ziad Hussein, PhD  
Haichen Yang, MD, MA  
Randi Fain, MD, FCCP  
Jacob Edelstein, PhD  
Dinesh Kumar, MS  
Jim Ferry, PhD

Dirección para correspondencia al  
Dr. Gidal: barry.gidal@wisc.edu

## RESUMEN

**Objetivo:** Evaluar el impacto concomitante de drogas antiepilépticas inductoras enzimáticas (CYP3A4) (DAEIE) sobre la eficacia y la seguridad de perampanel en pacientes sobre la base de 3 ensayos clínicos en fase III.

**Métodos:** Pacientes de 12 años de edad o mayores con crisis epilépticas de inicio parcial, farmacorresistentes en los 3 estudios clínicos de fase III recibieron 1 a 3 drogas antiepilépticas en forma concomitante. En el estudio de seguimiento por 6 semanas, los pacientes fueron asignados al azar a estudios de tratamiento doble ciego de una dosis diaria con placebo o perampanel 8 o 12 mg (estudio 304 y 305) o placebo y perampanel 2, 4 u 8 mg (estudio 306).

**Resultados:** La respuesta al tratamiento fue evaluada por el porcentaje de reducción de la mediana en la frecuencia de crisis y las tasas de respuesta de mejoría con perampanel en comparación con placebo. Sin embargo, en 8 y 12 mg, la respuesta al tratamiento fue significativamente mayor en los pacientes que no recibieron DAEIE. El efecto del tratamiento (perampanel-placebo) también demostró un incremento en la dosis-dependencia en todos los pacientes. La incidencia global de eventos adversos emergentes del tratamiento (EAET) fue similar independientemente de la presencia de DAEIE. La ocurrencia de algunos efectos secundarios, tales como fatiga, somnolencia, mareos, irritabilidad, fue mayor en los pacientes que recibieron drogas sin efecto inductor enzimático, al igual que la interrupción del tratamiento fue debida a estos eventos adversos.

**Conclusiones:** Perampanel muestra eficacia y seguridad en la presencia y ausencia de DAEIE. A medida que aumenta la exposición sistémica del perampanel, también lo hace su eficacia. Dado el extenso metabolismo del perampanel, la exposición sistémica está claramente reducida con la administración concomitante de inductores CYP3A4. Esto apoya la estrategia de dosificación del perampanel sobre la base del efecto clínico. El reconocimiento de estas interacciones farmacocinéticas es importante en la optimización de este nuevo medicamento.

**Clasificación de la evidencia:** Este estudio proporciona evidencia de Clase II de que con 2 a 12 mg/dosis de perampanel se reduce la frecuencia de las crisis y se produce una mejoría en la tasa de respuesta en presencia y ausencia de DAEIE. *Neurology*® 2015;84:1972-1980

## GLOSARIO

**ABC** = área bajo la curva; **ANCOVA** = análisis de covarianza; **CBZ** = carbamazepina; **DAE** = droga antiepiléptica; **DAEIE** = drogas antiepilépticas inductoras enzimáticas; **DFH** = fenitoína (difenilhidantoína); **EAET** = efectos adversos emergentes del tratamiento; **FC** = farmacocinética; **OXC** = oxcarbazepina.

A pesar de la aparición de varias drogas antiepilépticas (DAE) en los últimos 20 años, la ausencia completa de crisis en muchos pacientes con epilepsia sigue sin conseguirse.<sup>1-4</sup> Perampanel (FYCOMPA; Eisai Inc., Woodcliff Lake, Nueva Jersey) es el primero en una nueva clase de drogas antiepilépticas, actúa como un agonista selectivo no competitivo de los receptores AMPA (alfa-amino-3-hidroxi-5-metil-4-isoxazol ácido propínico), activo por vía oral aprobado ya en más de 40 países, entre ellos Estados Unidos y varios países de Europa, para el tratamiento adyuvante de crisis parciales con o sin generalización secundaria, en pacientes con epilepsia con edad  $\geq$  a 12 años, y en Canadá en pacientes  $\geq$  a 18 años.<sup>6-8</sup> La eficacia del perampanel fue demostrada en 3 estudios fase 3, multicéntricos, aleatorizados, doble ciego, de grupos paralelos comparado con placebo en ensayos clínicos en fase III de pacientes con crisis de inicio parcial resistentes al tratamiento a pesar de haber recibido dosis estables de 1 a 3 DAE.<sup>9-11</sup> Estos estudios demostraron claramente que, cuando se administró

De la Facultad de Farmacia (BEG), Universidad de Wisconsin, Madison; Eisai Neurociencia Unidad de Creación de Productos (AL, JF, HY, DK), Woodcliff Lake, Nueva Jersey; Eisai Ltd. (Z.H.), Hatfield, Reino Unido; Eisai Asuntos Médicos y Científicos (RF), Woodcliff Lake, Nueva Jersey; y ex integrante de Sui Generis Salud (J. E.), Nueva York, NY.

Ir a [Neurology.org](http://Neurology.org) para las declaraciones completas. Información de financiación y declaraciones consideradas relevantes por los autores, en su caso, se proporcionan al final del artículo. La carga de procesamiento del artículo fue pagado por Eisai Inc.

Este es un artículo de acceso abierto distribuido bajo los términos de la licencia Creative Commons Atribución -No Comercial No Derivada 3.0 License, que permite descargar y compartir el trabajo siempre que esté debidamente citados. El trabajo no puede ser cambiado en cualquier forma o utilizado comercialmente.

hasta 12 mg/d como tratamiento adyuvante de perampanel se redujo significativamente la frecuencia de las crisis y se incrementó las tasas de respondedores.<sup>9-11</sup>

Perampanel se elimina principalmente por metabolismo oxidativo, mediado principalmente por CYP3A4.<sup>12</sup> Análisis farmacocinéticos (FC) poblacionales han demostrado que 3 DAE inductoras enzimáticas frecuentemente utilizados (carbamazepina [CBZ], oxcarbazepina [OXC], fenitoína [DFH]) incrementan significativamente la metabolización oral aparente de perampanel.<sup>13,14</sup>

El análisis agrupado de los estudios de fase III mostraron que las concentraciones plasmáticas de perampanel aumentan proporcionalmente con la dosis de 2 a 12 mg.<sup>15</sup> En presencia de DAEIE, si bien a concentraciones más bajas, las concentraciones plasmáticas de perampanel se incrementaron de manera similar.<sup>15</sup> Es de mencionar, los análisis FC/farmacodinámicos mostraron que el incremento estable y constante de las concentraciones plasmáticas de perampanel se relacionaron con la reducción de la frecuencia de crisis<sup>14</sup> e incrementó la probabilidad de lograr una reducción del 50% o más en la frecuencia de crisis.<sup>16</sup>

Es esencial una evaluación posterior de la información clínica en fase III en estos pacientes para entender el impacto potencial de interacciones FC sobre la eficacia, tolerabilidad y la dosificación de esta nueva DAE.

**MÉTODOS Clasificación de la evidencia.** Esta evaluación de los estudios de fase clínica III proporciona evidencia de clase II que perampanel una vez al día (2-12 mg) redujo la frecuencia de crisis epilépticas y produjo una mejor tasa de respuesta en presencia y ausencia de DAEIE en pacientes farmacoresistentes con crisis de inicio parcial.

**Protocolos estándar aprobados, registros y consentimiento del paciente.** Los 3 estudios de fase III (304: NCT00699972; 305: NCT00699582 y 306: NCT00700310) se realizaron en América del Norte y del Sur, Europa, Australia, India, Israel, Rusia, Sudáfrica y Asia, entre abril de 2008 y enero 2011.<sup>6-8</sup> Todos los estudios fueron realizados de acuerdo con la Declaración de Helsinki, los requerimientos de la Agencia Europea de Medicina y el Código de Regulaciones Federales de Estados Unidos, según correspondiera. Las autoridades regulatorias de cada país y comités/juntas de ética de revisión institucional independiente revisaron los protocolos del ensayo, enmiendas y consentimientos informados.<sup>6-8</sup>

**Pacientes.** Los pacientes tenían edades iguales o mayores a 12 años, crisis epilépticas de inicio parcial (con o sin generalización secundaria) a pesar de recibir dosis estables de 1 a 3 DAE aprobadas.<sup>15</sup> Una descripción detallada de los criterios de inclusión/exclusión, método de asignación y otros detalles pueden ser encontrados en la publicación individual de los estudios.<sup>9-11</sup> A los pacientes se les permitió el uso sólo de una DAE con conocido efecto inductor del metabolismo de otra DAE. Estos fármacos fueron definidos desde el principio de los estudios como CBZ, DFH, fenobarbital o primidona.<sup>15</sup> Análisis FC poblacionales posteriores demostraron que solo

la CBZ, OXC y DFH resultaron en un incremento estadísticamente significativo en la metabolización oral de perampanel.<sup>15</sup> Para el análisis presentado aquí, se incluye como DAEIE solo CBZ, OXC y DFH.

**Diseño del estudio.** Se realizaron los estudios doble ciego en 3 fases: inicio del estudio, la fase de tratamiento doble ciego (período de titulación de dosis de 6 semanas seguido de un período de mantenimiento de 13 semanas), y una fase de seguimiento de 4 semanas para los pacientes que se retiraron prematuramente u optaron por no entrar en el estudio completo.<sup>9-11,17</sup> Los pacientes fueron asignados aleatoriamente a una dosis diaria doble ciego de placebo, perampanel 8 mg o perampanel de 12 mg (1:1:1) en los estudios 304 y 305.<sup>9,10</sup> En estudio 306, los pacientes fueron asignados al azar a placebo o a perampanel 2, 4 o 8 mg (1: 1: 1).<sup>11</sup> Durante la fase de titulación, la dosis de perampanel se incrementó en razón de 2 mg por semana a la dosis aleatorizada, y se permitió reducciones de dosis para pacientes con intolerabilidad.<sup>9-11,17</sup> Los pacientes tratados con perampanel continuaron el tratamiento con la dosis alcanzada durante la titulación durante todo el período de mantenimiento.<sup>9-11</sup>

**Evaluación de eficacia y de seguridad.** La evaluación de la eficacia incluyó el porcentaje de reducción de la mediana de la frecuencia basal de crisis (todos los tipos de crisis de inicio parcial) por 28 días de tratamiento durante el período doble ciego y la tasa de respuesta (proporción de pacientes que consiguieron una reducción del 50% o más en la frecuencia de crisis por 28 días en el período de mantenimiento *versus* la condición basal) en presencia y ausencia concomitante de DAEIE.<sup>9-11,15</sup>

Una gran reducción en el porcentaje de la media en la frecuencia de crisis por 28 días se observó en los grupos de perampanel de 8 mg en todas las regiones. Sin embargo, una tasa de respuesta del placebo inusualmente alta del 33,3% se observó en el estudio 304 entre los pacientes de las regiones de América Central y del Sur en comparación con los sectores de América del Norte, que mostraron una tasa de respuesta del 21,9%.<sup>9</sup> Por otra parte, la tasa de respuesta de los pacientes tratados con placebo en los estudios 305 y 306 fue 14,7% y 17,9%, respectivamente.<sup>10,11</sup> Una significativa ( $p = 0,042$ ) interacción de tratamiento por región para América Central y Sur se observó tras un análisis de covarianza (ANCOVA) usando datos de rango transformado de todas las regiones y en el grupo de tratamiento de 8 mg (comunes a los 3 estudios). La seguridad global, FC y el perfil FC/farmacodinámico fueron similares en general para las regiones de América Central y del Sur comparadas con la población total, y las razones de la alta respuesta al placebo son aún desconocidas.

Las evaluaciones de seguridad incluyen las tasas de incidencia de la mayoría de los eventos adversos frecuentes asociados al tratamiento (EAET).<sup>9-11,15</sup> El grupo en que se realizó el análisis de seguridad incluyó a todos los pacientes aleatorizados que recibieron el fármaco de estudio y tenían al menos una evaluación de la seguridad después de la dosis. El grupo de los que completaron el tratamiento incluyó pacientes del grupo intención de tratar que completaron el estudio doble ciego.

Los análisis de dosis-respuesta también se realizaron con la última dosis tomada por los sujetos en lugar de la dosis al azar porque los análisis aleatorios de dosis pueden subestimar la eficacia en dosis más altas en DAE típicas de los ensayos clínicos.<sup>13</sup>

**Análisis estadístico.** Para mostrar el efecto diferencial en dosis de las DAEIE, los análisis que aquí se presentan utilizan la dosis última del grupo de pacientes en fase III que completaron el estudio. Se notó significancia estadística de eficacia de perampanel con DAEIE y DAE no IE en comparación con dosis de perampanel con placebo sólo en estudios en los cuales se incluyó la dosis (2 y 4 mg, estudio 306; 8 mg, estudio 304, 305 y 306; 12 mg, estudio 304 y 305). Debido a la distribución asimétrica, la frecuencia basal de las crisis por 28 días y el cambio de porcentaje por 28 días durante el tratamiento fueron modificadas a rango en forma separada antes del análisis de la variación porcentual de la mediana basal en la frecuencia de crisis. Un ANCOVA fue entonces realizado sobre los datos de rango transformadas (rango ANCOVA)

con el tratamiento y la región como los factores y el rango de base de la frecuencia de crisis como covariante. Un valor  $p \leq 0,05$  fue considerado estadísticamente significativo. El efecto del tratamiento se presenta como reducción de la mediana en la frecuencia de crisis durante el período de mantenimiento. Se proporcionan estimaciones robustas no paramétricas de Hodges-Lehmann de la mediana de los efectos del tratamiento para placebo corregidos y el 95% del intervalo de confianza. Rango ANCOVA se utilizó para comparar el cambio porcentual medio entre los grupos de DAEIE y DAE no IE. Las tasas de respuesta fueron analizadas durante el período de mantenimiento (última observación llevada a cabo), utilizando la prueba de  $\chi^2$ . Las características basales, la incidencia de pacientes que discontinuaron, y los efectos adversos en general fueron comparados entre los grupos de dosis de perampanel de DAEIE y DAE no IE utilizando ANCOVA para las variables continuas y la prueba de  $\chi^2$  para variables categóricas.

**RESULTADOS Pacientes.** Un total de 1480 pacientes fueron aleatorizados y tratados en los estudios

304, 305 y 306.<sup>15,18</sup> Al inicio del estudio, la edad, índice de masa corporal y el tiempo desde el diagnóstico de la epilepsia fueron similares en los pacientes que estaban recibiendo DAEIE (CBZ, OXC o DFH) y aquellos que no recibieron DAEIE (tabla 1). En general, hubo porcentajes ligeramente más altos de varones, hispanos y asiáticos entre los pacientes que recibieron DAEIE al inicio comparado con aquellos que no recibieron las DAEIE (tabla 1). Se observaron diferencias de raza y sexo sólo para 4 mg y 10 a 12 mg, respectivamente ( $p \leq 0,05$ ; tabla 1). Del total de pacientes, 1264 que completaron el período de mantenimiento de los estudios de fase III fueron incluidos en la última dosis de análisis.

**Análisis de la FC poblacional.** En presencia de DAEIE, las concentraciones plasmáticas promedio estables de perampanel para la última dosis al final del período de mantenimiento fueron numé-

**Tabla 1** Características basales con y sin DAEIE en pacientes basales por actual (última) dosis de perampanel (grupos de seguridad 304 305 y 306)

| Categoría                                                                 | Placebo      | Perampanel, <sup>a</sup> mg |                        |              |                        |
|---------------------------------------------------------------------------|--------------|-----------------------------|------------------------|--------------|------------------------|
|                                                                           |              | 2                           | 4                      | 6-8          | 10-12                  |
| <b>Número</b>                                                             |              |                             |                        |              |                        |
| DAEIE                                                                     | 255          | 115                         | 100                    | 264          | 131                    |
| DAE no IE                                                                 | 187          | 86                          | 87                     | 192          | 62                     |
| <b>Edad media (DE), años</b>                                              |              |                             |                        |              |                        |
| DAEIE                                                                     | 33.5 (13.5)  | 32.8 (13.3)                 | 33.7 (13.1)            | 35.9 (13.7)  | 35.8 (13.8)            |
| DAE no IE                                                                 | 35.4 (13.5)  | 35.4 (13.8)                 | 33.2 (12.2)            | 36.1 (14.2)  | 35.5 (14.6)            |
| <b>Varones, n (%)</b>                                                     |              |                             |                        |              |                        |
| DAEIE                                                                     | 129 (50,6)   | 57 (49,6)                   | 54 (54,0)              | 128 (48,5)   | 70 (53,4)              |
| DAE no IE                                                                 | 91 (48,7)    | 38 (44,2)                   | 39 (44,8)              | 90 (46,9)    | 22 (35,5) <sup>b</sup> |
| <b>Raza, n (%) con DAEIE</b>                                              |              |                             |                        |              |                        |
| Blancos                                                                   | 187 (73,3)   | 72 (62,6)                   | 57 (57,0)              | 203 (76,9)   | 105 (80,2)             |
| Negros/Africanos americanos                                               | 8 (3,1)      | 0                           | 0                      | 5 (1,9)      | 5 (3,8)                |
| Asiáticos                                                                 | 34 (13,3)    | 24 (20,9)                   | 23 (23,0)              | 31 (11,7)    | 14 (10,0)              |
| Chinos                                                                    | 17 (6,7)     | 18 (15,7)                   | 20 (20,0)              | 14 (5,3)     | 0                      |
| Indios Americanos/Nativos de Alaska                                       | 0            | 1 (1,9)                     | 0                      | 3 (1,1)      | 1 (0,8)                |
| Otras                                                                     | 9 (3,5)      | 0                           | 0                      | 8 (3,0)      | 6 (4,6)                |
| <b>Raza, n (%) con DAE no IE</b>                                          |              |                             |                        |              |                        |
| Blancos                                                                   | 150 (80,2)   | 60 (69,8)                   | 65 (74,7) <sup>b</sup> | 160 (83,3)   | 55 (88,7)              |
| Negros/Africanos americanos                                               | 6 (3,2)      | 0                           | 0                      | 4 (2,1)      | 3 (4,8)                |
| Asiáticos                                                                 | 12 (6,4)     | 17 (19,8)                   | 10 (11,5)              | 12 (6,3)     | 1 (1,6)                |
| Chinos                                                                    | 14 (7,5)     | 8 (9,3)                     | 11 (12,6)              | 10 (5,2)     | 0                      |
| Indios Americanos/Nativos de Alaska                                       | 1 (0,5)      | 0                           | 0                      | 1 (0,5)      | 0                      |
| Otras                                                                     | 4 (2,1)      | 1 (1,2)                     | 1 (1,1)                | 5 (2,6)      | 3 (4,8)                |
| <b>IMC medio, kg/m<sup>2</sup></b>                                        |              |                             |                        |              |                        |
| No                                                                        | 252          | 114                         | 100                    | 263          | 128                    |
| DAEIE                                                                     | 24,0 (14-51) | 23,0 (16-39)                | 23,9 (17-40)           | 24,6 (16-45) | 24,8 (16-46)           |
| Número                                                                    | 185          | 86                          | 85                     | 191          | 62                     |
| DAE no IE                                                                 | 23,6 (17-43) | 23,5 (16-39)                | 23,8 (12-38)           | 25,5 (15-43) | 25,7 (16-44)           |
| <b>Tiempo medio desde el diagnóstico de epilepsia (DE), a<sup>c</sup></b> |              |                             |                        |              |                        |
| DAEIE                                                                     | 21.4 (12.5)  | 19.3 (12.2)                 | 20.9 (12.9)            | 22.7 (13.4)  | 22.8 (13.8)            |
| DAE no IE                                                                 | 19.7 (12.1)  | 19.9 (11.6)                 | 18.8 (11.9)            | 21.0 (12.9)  | 20.9 (13.7)            |

Abreviaturas: DAEIE = droga antiepiléptica inductora de enzima (CYP3A4); IMC = índice de masa corporal; DAEIE incluyen carbamazepina, oxcarbazepina o fenitoína.

<sup>a</sup> Pacientes tratados durante el estudio doble ciego.

<sup>b</sup>  $p = 0,01$  para las razas (blanco) a 4 mg, y  $p = 0,02$  para sexo a 12 mg entre DAEIE y DAE no IE. Para el resto de la dosis grupos  $p > 0,1$ .

<sup>c</sup> Datos faltantes de 3 pacientes en el grupo de DAEIE (n = 1, perampanel 4 mg; n = 1, 8 mg; n = 1, 12 mg).

ricamente inferiores comparadas con las DAE no IE (tabla e-1 en *Neurology*<sup>®</sup> Web site en *Neurology.org*).<sup>15</sup> Sin embargo, también aumentó linealmente en una forma dependiente de la dosis en pacientes que toman DAEIE y DAE no IE.

En el análisis de farmacocinética poblacional, fenobarbital no tuvo efecto sobre la metabolización de perampanel y la concentración resultante mientras que el topiramato redujo el área bajo la curva (ABC) en 20% (clínicamente no relevante). En comparación, CBZ, OXC y PHT aumentaron la metabolización de perampanel por 3-, 2- y 2 veces, respectivamente (tabla e-2). Esto resultó en la reducción del ABC del perampanel y se consideró clínicamente relevante.

**Las variables de eficacia.** Los datos en la figura e-1 muestran que el tratamiento con perampanel aumentó el cambio porcentual de la media basal en la frecuencia de crisis y las tasas de respuesta (proporción de pacientes con  $\geq 50\%$  de disminución en la frecuencia de las crisis) de participantes que finalizaron, en presencia y ausencia de DAEIE, en última dosis. En ausencia de DAEIE, la reducción en la frecuencia de crisis se observó para las distintas dosis de perampanel a excepción de 4 mg (figura e-1). Además, las tasas de respuesta fueron numéricamente inferiores en presencia de DAEIE en todos los grupos de dosis (Figura E-1). Este análisis incluye la población de Centroamérica y América del Sur del estudio 304, donde un alto efecto de respuesta al placebo fue observado, dando lugar a la única interacción de tratamiento por región del programa de fase III.<sup>9</sup> Debido a que el análisis previo ha demostrado una interacción tratamiento por región ( $p = 0,042$ ) indicando que América Central y del Sur difieren de todas las demás regiones en los estudios combinados, los análisis adicionales presentados no incluyen datos desde sitios en América Central y del Sur (figura 1, tabla 2). Tal como se presenta en la figura 1, una respuesta dependiente de dosis se observó con el tratamiento con perampanel mostrando una mejora en el control de las convulsiones, independientemente de la presencia o ausencia de DAEIE.

En dosis de perampanel de 8 y 12, la respuesta al tratamiento (según la evaluación del porcentaje de reducción de la mediana en la frecuencia de crisis o de tasa de respuesta) fue más robusta cuando perampanel fue dado concomitantemente con los DAE no IE en comparación con DAEIE ( $p \leq 0,05$ ; figura 1). Dosis de perampanel de 4, 8 y 12 mg, administradas en forma concomitante con DAE no IE, mostraron una mejora del cambio porcentual de la media en la frecuencia de crisis ( $p = 0,018$ ;  $p < 0,0001$ ;  $p = 0,008$ , respectivamente) en comparación con placebo, mientras que 8 y 12 mg de perampanel suministradas concomitantemente con DAEIE mostraron una mejoría en comparación con el placebo ( $p = 0,0001$ ;  $p = 0,016$ , respectivamente; figura 1A). En consecuencia, el efecto del tratamiento (expresado en tasas de respuesta perampanel-placebo) también demostró un aumento dosis-dependiente similar en la respuesta terapéutica que fue numéricamente mayor en pacientes que recibieron los no DAEIE (tabla 2). Los datos para las dosis de 6 mg ( $n = 23$ ) y 10 mg ( $n = 4$ ) no se

presentan, ya que muy pocos pacientes fueron tratados en estos niveles de dosis.

**Eventos adversos.** El número de pacientes que completaron el estudio se muestra en la tabla 3. Las tasas de finalización para los pacientes que recibieron DAEIE fueron similares para cada grupo de dosis de perampanel y para los grupos de placebo. Las tasas de finalización para pacientes que no recibieron DAEIE rondó entre el 74,2% al 87,4%. Con la excepción de los grupos de 10 a 12 mg, las tasas de finalización fueron similares para las 2 cohortes de pacientes. Una alta tasa de finalización en pacientes en dosis de 10 a 12 mg que recibieron DAEIE sugiere que este grupo podría mantener dosis altas de perampanel. La causa primaria de discontinuación tanto en presencia como ausencia de DAEIE fue la ocurrencia de EAET. La información muestra que, para dosis de perampanel superiores a 4 mg/d, los EAET que conducen a la discontinuación del estudio fueron más frecuentes en pacientes que no recibieron DAEIE ( $p \leq 0,05$ ; tabla 3).

La incidencia global de EAET fue ligeramente superior en pacientes que reciben DAE no IE en comparación con aquellos que recibieron DAEIE, con la mayor diferencia (8,3%) en el grupo de perampanel de 6 a 8 mg (tabla 4). Sin embargo, la incidencia de cualquier EAET no mostró una diferencia entre los pacientes que recibieron concomitante DAEIE y DAE no IE. Los EAET que más frecuentemente ocurrieron ( $\geq 10\%$ ) para cualquier grupo de tratamiento de perampanel fueron mareos, somnolencia y cefalea (tabla 4). Los EAET que más frecuentemente ocurrieron ( $\geq 10\%$ ) para cualquier grupo de perampanel que recibían DAE no IE fueron mareos, somnolencia, fatiga, cefalea, irritabilidad, ataxia y caídas (tabla 4).

**DISCUSIÓN** El objetivo de este análisis fue demostrar el impacto de DAEIE concomitantes en la eficacia y seguridad de perampanel, ya su vez proporcionar una base para las recomendaciones de dosificación del perampanel. La monoterapia es generalmente el tratamiento de primera línea preferido para la epilepsia; sin embargo, una significativa proporción de pacientes requerirá regímenes consistentes en múltiples fármacos antiepilépticos para lograr el éxito del tratamiento. Las interacciones FC derivadas de la politerapia tienen el potencial para complicar el manejo de la epilepsia.<sup>19</sup> A pesar de la disponibilidad de nuevos DAE que están desprovistos de interacciones farmacológicas, la comedición con DAEIE es todavía de uso extenso.<sup>20,21</sup> Para los medicamentos como perampanel que se metaboliza ampliamente a través del sistema de la isoenzima CYP, las interacciones que aumentan el metabolismo vía oral (y, en consecuencia, disminuyen la exposición sistémica) tienen el potencial de reducir en última instancia la eficacia clínica.<sup>22</sup> Debido a que perampanel ha sido aprobado como terapia adyuvante, es importante para los médicos el comprender estas potenciales interacciones FC para maximizar su beneficio terapéutico y reducir el riesgo de eventos adversos.<sup>19</sup>

Nuestro análisis demuestra que perampanel es eficaz en pacientes cuando se administra como

**Figura 1** Respuesta al tratamiento en el grupo que completó el tratamiento por dosis actual (última) de perampanel (estudio 304, 305 y 306)

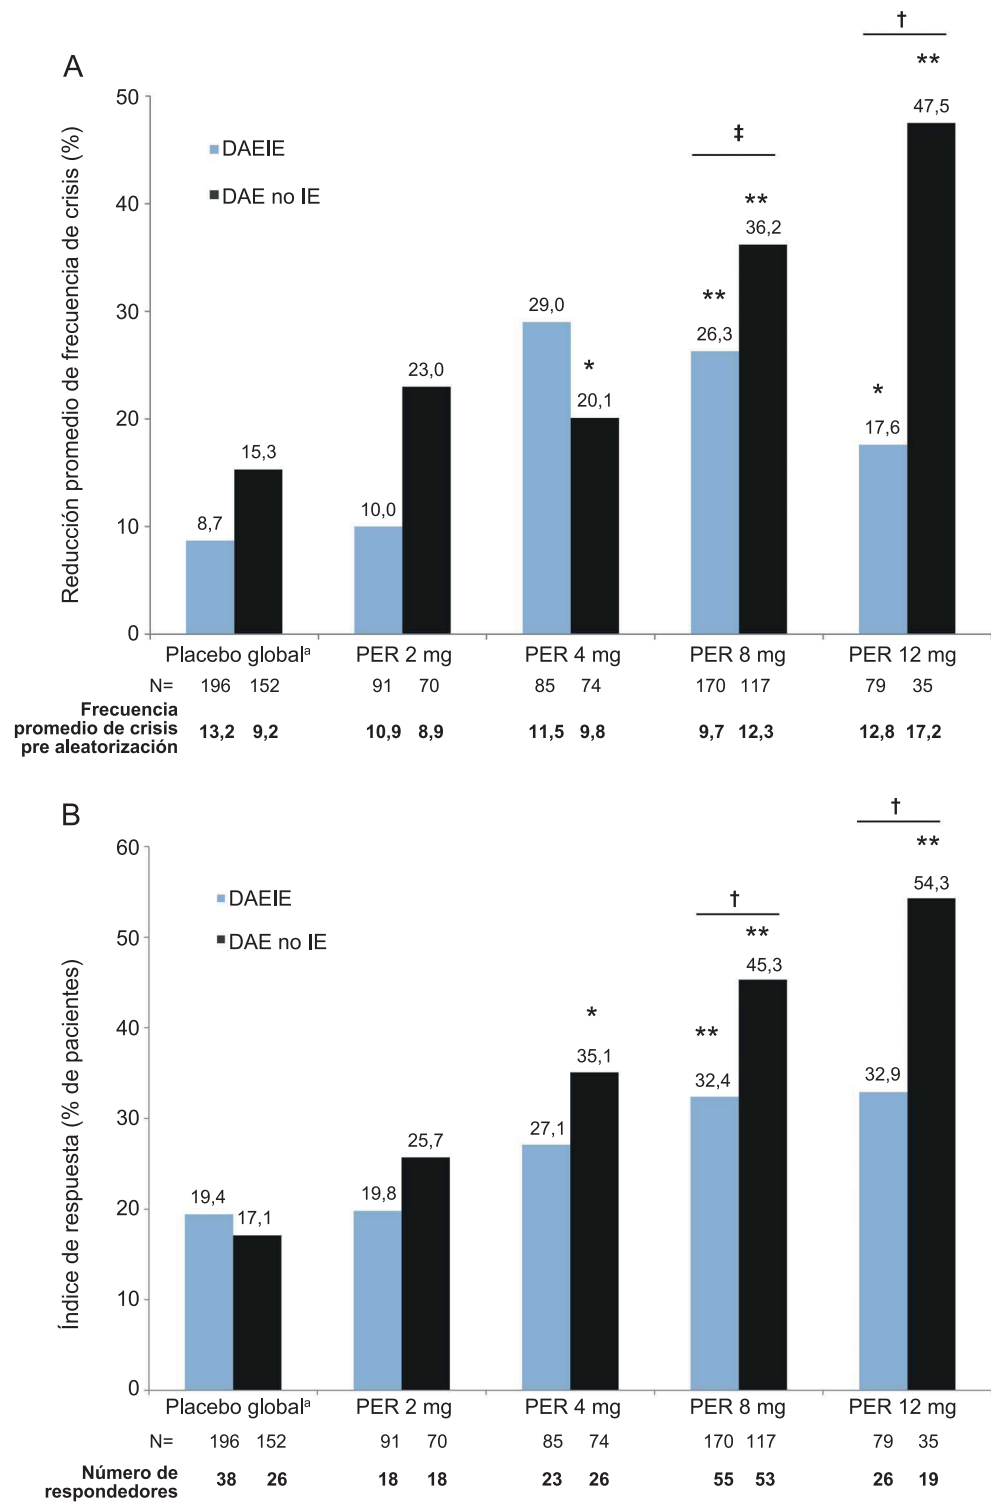

(A) Reducción porcentual promedio en frecuencia de crisis por 28 días desde la línea de base a lo largo de un período doble ciego. (B) Tasa de respuesta durante el período de mantenimiento. Excluye pacientes de América Central y Sudamérica y perampanel a 6 y 10 mg. DAEIE incluye carbamazepina, oxcarbazepina o fenitoína. <sup>a</sup>Placebo global se muestra en el gráfico; reducción porcentual promedio en frecuencia de crisis para cada grupo de dosis se utilizó para el análisis estadístico (placebo DAEIE: 2 mg = 10,1; 4 mg = 10,1; 8 mg = 8,7; 12 mg = 5,8; DAE no IE placebo: 2 mg = 12,7; 12,7 4 mg; 8 mg = 15,3; 12 mg = 15,9). <sup>b</sup>Placebo global se muestra en el gráfico; tasa de respuesta al placebo de cada grupo de dosis se utilizó para el análisis estadístico (DAEIE placebo: 2 mg = 18,1; 4 mg = 18,1; 8 mg = 19,4; 12 mg = 20,6; DAE no IE placebo: 2 mg = 19,4; 4 mg = 19,4; 8 mg = 17,1; 12 mg = 15,0). \* $p < 0,05$ ; \*\* $p < 0,01$  vs placebo para cada dosis; † $p < 0,05$ ; ‡ $p < 0,005$  DAEIE vs las DAE no IE para cada dosis basado en análisis de rango de covarianza (para reducción porcentual de la mediana) y la prueba de  $\chi^2$  (tasa de respuesta). DAEIE = fármaco antiepiléptico inductor de la enzima (CYP3A4); N = número de pacientes en cada grupo.

**Tabla 2 Mediana del efecto del tratamiento ajustado a placebo por última dosis de perampanel basada en la presencia o ausencia de DAEIE durante el período de mantenimiento (estudios 304, 305 y 306)<sup>a</sup>**

| Medición, grupo basal DAE                                      | Perampanel, mg    |                                |                                |                                |
|----------------------------------------------------------------|-------------------|--------------------------------|--------------------------------|--------------------------------|
|                                                                | 2                 | 4                              | 8                              | 12                             |
| <b>Reducción promedio desde placebo<sup>b</sup> (95%CI), %</b> |                   |                                |                                |                                |
| DAEIE                                                          | 0,5 (212,7; 14,3) | 11,9 (21,6; 24,5)              | 14,4 <sup>c</sup> (4,0; 24,3)  | 19,2 <sup>c</sup> (4,4; 34,3)  |
| DAE no IE                                                      | 8,2 (27,1; 24,3)  | 15,3 <sup>c</sup> (21,3; 31,1) | 25,7 <sup>d</sup> (14,7; 36,4) | 33,2 <sup>d</sup> (17,7; 47,3) |
| <b>Tasa de respuesta<sup>e</sup> (droga-placebo) %</b>         |                   |                                |                                |                                |
| DAEIE                                                          | 1,9               | 8,1                            | 13,0 <sup>f</sup>              | 12,3                           |
| DAE no IE                                                      | 6,3               | 15,4 <sup>g</sup>              | 28,2 <sup>f</sup>              | 39,3 <sup>f</sup>              |

Abreviaturas: DAE = droga antiepiléptica; IC = intervalo de confianza; DAEIE = droga antiepiléptica inductora de enzima (CYP3A4). DAEIE incluyen carbamazepina, oxcarbazepina o fenitoína. Se excluyeron los pacientes de la región de América Latina debido a una interacción en tratamiento significativa por región debido a la alta respuesta al placebo.

<sup>a</sup> Perampanel a 6 y 10 mg no incluidos en este análisis debido al pequeño número de pacientes en estos niveles de dosis.

<sup>b</sup> Todos los valores representan valores medios para el efecto del tratamiento. Los efectos promedio corregidos del tratamiento con placebo fueron estimados por el método de Hodges-Lehmann (HL) (HL estimado + 95% CI); <sup>c</sup>  $p \leq 0,05$ ; <sup>d</sup>  $p < 0,001$  vs placebo.

<sup>e</sup> Proporción de pacientes con disminución de  $\geq 50\%$  en la frecuencia de crisis; <sup>f</sup>  $p < 0,01$ ; <sup>g</sup>  $p \leq 0,05$  vs placebo basado en prueba de  $\chi^2$ .

tratamiento adyuvante; sin embargo, la magnitud esperada de la respuesta terapéutica puede verse influida por la terapia concomitante. Este hallazgo no aparece reflejar una interacción farmacodinámica. De acuerdo con un análisis previo, el tratamiento concomitante con DAEIE no altera la relación concentración-respuesta plasmática de perampanel para la eficacia o tolerabilidad.<sup>13</sup> Más bien, basado en el análisis FC que mostró que las concentraciones plasmáticas estables de perampanel pueden ser reducidas en pacientes que reciben medicaciones inductoras de CYP3A4, la explicación más razonable es que la curva dosis-respuesta de perampanel se desplaza en pacientes que reciben DAE inductoras.<sup>13</sup> En otras palabras, dado que la probabilidad de la eficacia de perampanel aumenta con el aumento de su exposición sistémica (es decir, la concentración plasmática), entonces dosis mayores en un esquema de dosificación cada vez más frecuente debería ser requerido para maximizar la eficacia cuando se usa perampanel en pacientes que reciben drogas como CBZ, OXC o DFH. En un análisis FC poblacional, fenobarbital no tuvo efectos significativos sobre el ABC del perampanel y el topiramato redujo el ABC un 20% (clínicamente no relevante). En comparación, CBZ, OXC y DFH afectaron el *clearance*

oral del perampanel y redujeron subsecuentemente el ABC en alrededor del 67%, 50% y 50% respectivamente, todos los cuales fueron considerados clínicamente importantes. Además, resultados de análisis FC poblacionales demostraron que 12 mg de perampanel no afectaron significativamente el *clearance* de algunas DAE, incluida la DFH, pero incrementaron sustancialmente el *clearance* de CBZ y otras DAE, aunque estos incrementos fueron menores del 10%. La coadministración de OXC resultó en un decremento del 26% en la metabolización de OXC e incremento sus concentraciones.

En la práctica básica, las agencias regulatorias recomiendan dos abordajes en el manejo de la dosificación adecuada del perampanel para pacientes que están también recibiendo DAEIE. La información de prescripción recomendada por la FDA es una dosis de inicio de 2 mg/d (administrada a la noche) para pacientes que están tomando drogas DAE no IE y 4 mg/d para pacientes que toman DAEIE.<sup>6</sup> La dosis de perampanel puede incrementarse gradualmente en 2 mg/d por semana con incrementos máximos a dosis de 4 a 12 mg/día basados en la respuesta clínica y tolerabilidad.<sup>6</sup> La Agencia Médica Europea recomienda el inicio de tratamiento con perampanel a 2 mg/día independientemente de la

**Tabla 3 Tasas de finalización e incidencia de EAET que llevaron a la discontinuación de la dosis diaria real (última) de perampanel en presencia y ausencia de DAEIE (seguridad en conjunto de los estudios 304, 305 y 306)**

| Categoría                              | Placebo     | Perampanel, <sup>a</sup> mg |             |                        |                        |
|----------------------------------------|-------------|-----------------------------|-------------|------------------------|------------------------|
|                                        |             | 2                           | 4           | 6-8                    | 10-12                  |
| <b>DAEIE</b>                           |             |                             |             |                        |                        |
| Tratados con                           | 255 (100,0) | 115 (100,0)                 | 100 (100,0) | 264 (100,0)            | 131 (100,0)            |
| Completado                             | 229 (89,8)  | 92 (80,0)                   | 85 (85,0)   | 226 (85,6)             | 118 (90,1)             |
| EAET que llevaron a la discontinuación | 8 (3,1)     | 6 (5,2)                     | 8 (8,0)     | 17 (6,4)               | 10 (7,6)               |
| <b>DAE no IE</b>                       |             |                             |             |                        |                        |
| Tratados con                           | 187 (100,0) | 86 (100,0)                  | 87 (100,0)  | 192 (100,0)            | 62 (100,0)             |
| Completado                             | 163 (87,2)  | 70 (81,4)                   | 76 (87,4)   | 158 (82,3)             | 46 (74,2)              |
| EAET que llevaron a la discontinuación | 9 (4,8)     | 9 (10,5)                    | 5 (5,7)     | 23 (12,0) <sup>b</sup> | 15 (24,2) <sup>b</sup> |

Abreviaturas: DAEIE: drogas antiepilépticas inductoras enzimáticas (CYP3A4); EAET: eventos adversos emergentes del tratamiento. La información está expresada en n (%). Las DAEIE incluyen carbamazepina, oxcarbazepina, fenitoína.

<sup>a</sup> Pacientes tratados durante el estudio doble ciego. Las dosis de los grupos están basadas en la dosis diaria actual (última) recibida.

<sup>b</sup>  $p = 0,047$  y  $p = 0,002$  para 8 y 12 mg entre DAEIE y DAE no IE. Para los otros grupos de dosis de perampanel  $p > 0,1$

**Tabla 4 Tasas de las TEAE más comunes ( $\geq 10\%$ ) por real (última) dosis diaria de perampanel en presencia y ausencia de DAEIE (grupos de seguridad de estudios 304, 305 y 306)**

| MedDRA                        | Placebo    | Perampanel, <sup>a,b,c</sup> mg |           |            |            |
|-------------------------------|------------|---------------------------------|-----------|------------|------------|
|                               |            | 2                               | 4         | 6-8        | 10-12      |
| <b>DAEIE<sup>a</sup></b>      |            |                                 |           |            |            |
| <b>Nro. pacientes</b>         | 255        | 115                             | 100       | 264        | 131        |
| <b>Sujetos con algún TEAE</b> | 166 (65,1) | 74 (64,3)                       | 65 (65,0) | 209 (79,2) | 112 (85,5) |
| <b>Mareos</b>                 | 23 (9,0)   | 13 (11,3)                       | 19 (19,0) | 96 (36,4)  | 47 (35,9)  |
| <b>Somnolencia</b>            | 21 (8,2)   | 19 (16,5)                       | 11 (11,0) | 38 (14,4)  | 15 (11,5)  |
| <b>Cefalea</b>                | 28 (11,0)  | 15 (13,0)                       | 14 (14,0) | 28 (10,6)  | 17 (13,0)  |
| <b>DAE no IE</b>              |            |                                 |           |            |            |
| <b>Nro. pacientes</b>         | 187        | 86                              | 87        | 192        | 62         |
| <b>Sujetos con algún TEAE</b> | 128 (68,4) | 54 (62,8)                       | 61 (70,1) | 168 (87,5) | 55 (88,7)  |
| <b>Mareos</b>                 | 17 (9,1)   | 13 (15,1)                       | 18 (20,7) | 62 (32,3)  | 23 (37,1)  |
| <b>Somnolencia</b>            | 11 (5,9)   | 5 (5,8)                         | 10 (11,5) | 41 (21,4)  | 11 (17,7)  |
| <b>Fatiga</b>                 | 8 (4,3)    | 4 (4,7)                         | 7 (8,0)   | 26 (13,5)  | 10 (16,1)  |
| <b>Cefalea</b>                | 22 (11,8)  | 5 (5,8)                         | 9 (10,3)  | 25 (13,0)  | 5 (8,1)    |
| <b>Irritabilidad</b>          | 9 (4,8)    | 3 (3,5)                         | 7 (8,0)   | 18 (9,4)   | 7 (11,3)   |
| <b>Ataxia</b>                 | 0          | 0                               | 1 (1,1)   | 17 (8,9)   | 7 (11,3)   |
| <b>Caídas</b>                 | 7 (3,7)    | 0                               | 2 (2,3)   | 15 (7,8)   | 7 (11,3)   |
| <b>Insomnio</b>               | 12 (6,4)   | 2 (2,3)                         | 1 (1,1)   | 10 (5,2)   | 7 (11,3)   |

Abreviaturas: DAEIE = Droga antiepiléptica inductora de enzima (CYP3A4); MedDRA = Diccionario Médico de Actividades Reguladas; TEAE = tratamiento de eventos adversos emergentes.

Los datos son n (%). DAEIE incluyen carbamazepina, oxcarbazepina o fenitoína. TEAE se define como un evento adverso que o bien comienza a partir de la primera fecha de la dosis y hasta 30 días después de la última fecha de la dosis del fármaco del estudio; o comienza antes de la fecha de primera dosis y aumenta en gravedad durante el período de tratamiento. Un sujeto con  $\geq 2$  eventos adversos con el mismo término preferido es contado sólo una vez para ese término preferido.

<sup>a</sup> Los términos preferidos de MedDRA se clasifican en orden decreciente de frecuencia en el total de pacientes tratados con perampanel durante el estudio doble ciego.

<sup>b</sup> Pacientes tratados durante el estudio doble ciego. Grupos de dosis se basan en la (última) dosis diaria real de perampanel.

<sup>c</sup>  $p > 0,4$  para todos los grupos de dosis para cualquier TEAE entre DAEIE y DAE no IE.

concomitancia de DAEIE.<sup>7</sup> Debido a que la vida media del perampanel va a ser reducida drásticamente por las DAEIE,<sup>6</sup> los pacientes que reciben DAEIE pueden titular su dosis semanalmente mientras que los pacientes que reciban DAE no IE deberían realizar titulaciones con una frecuencia no menor que la bisemanal.<sup>7</sup> Las dosis pueden incrementarse sobre la base de la respuesta clínica y tolerabilidad a una dosis de mantenimiento de 4 a 8 mg/d.<sup>7</sup> Dependiendo de la respuesta clínica y tolerabilidad individual a la dosis de 8 mg día, la dosis puede ser incrementada a 12 mg/d.<sup>6,7</sup> Cada grupo de recomendaciones presentan diferentes abordajes para enfrentar los problemas asociados al uso de DAEIE; sin embargo, ambas llegan a los mismos resultados: la titulación gradual a lo largo del tiempo de la dosis en pacientes con DAEIE concomitantes, compensa el aumento de la eliminación del perampanel mediada por CYP3A4.

En cuanto a los eventos adversos, en especial aquellos que conducen a la interrupción del tratamiento, el perfil de perampanel en presencia y ausencia de DAEIE era cualitativamente comparable aunque cuantitativamente algo más alto en ausencia de DAEIE. Los eventos adversos comunes ( $\geq 10\%$ ) en presencia y ausencia de DAEIE fueron mareos, somnolencia, fatiga, dolor de cabeza, irritabilidad, ataxia y caídas, lo que es compatible con los eventos adversos en los estudios generales de fase III. El evento adverso con mayor incidencia fueron los mareos, los cuales fueron similares entre DAEIE y DAE no IE. Sin embargo, en dosis mayores de pe-

rampanel, la somnolencia fue moderadamente inferior con DAEIE, lo que sugiere que la reducción de las concentraciones plasmáticas de perampanel con DAEIE puede reducir la incidencia de somnolencia y otros eventos adversos. En general, las tasas de abandono del estudio debido a eventos adversos fueron mayores en el grupo de pacientes que recibió los DAE no IE. Es ciertamente plausible que, en estos pacientes, las concentraciones plasmáticas de perampanel en cada nivel de dosis fueron mayores que en aquellos que recibieron DAEIE, como se mostró previamente.<sup>15</sup> Aunque los abandonos debido a eventos adversos fueron superiores a una dosis alta de 10 a 12 mg para el grupo DAE no IE (24,2%) en comparación con el grupo que recibió DAEIE (7,6%), las tasas de respuesta fueron 39% *vs* 12%, respectivamente, para los 2 grupos. Esto está en concordancia con los resultados publicados, lo que sugiere que para los pacientes que son capaces de tolerar perampanel a mayores dosis (que resulta en mayores concentraciones de FC en el grupo DAE no IE, en este caso), hay beneficios adicionales en el control de crisis.<sup>23</sup>

Además de reconocer el potencial de aceleración del metabolismo de perampanel al agregarlo a un régimen que contenía un DAEIE, los médicos también deben ser conscientes de la posibilidad de desinducción. Cuando se reduce o retira los DAEIE de un régimen de tratamiento en un paciente, las concentraciones plasmáticas de perampanel es probable que aumenten, lo cual puede resultar en nuevos o intensificados eventos adversos. Debido a la

relativamente larga vida media de perampanel, los potenciales cambios en la respuesta clínica debido a cambios en la concentración plasmática son de esperar que evolucionen lentamente. Los médicos deberán monitorear estrechamente la respuesta clínica y tolerabilidad de estos pacientes al reducir o retirar un DAEIE.

Cuando se utiliza perampanel como terapia coadyuvante, los médicos pueden esperar razonablemente una respuesta terapéutica favorable en pacientes farmacoresistentes con convulsiones de inicio parcial, independientemente de las DAE concomitantes. Es de destacar que este análisis *post hoc* sugiere que interacciones FC inductoras enzimáticas son determinantes importantes en la optimización de la terapia con esta nueva molécula. Los médicos deberán considerar medicamentos concomitantes al iniciar el tratamiento con perampanel y cuando se determinan las dosis óptimas de mantenimiento así como la tolerabilidad del paciente.

#### CONTRIBUCIONES DE LOS AUTORES

Dr. Gidal: estudio concepto y el diseño, adquisición de datos, análisis de datos y la interpretación, la redacción del manuscrito, supervisión del estudio. Dr. Laurenza: análisis e interpretación de datos, revisión crítica del manuscrito. Dr. Hussein: análisis de datos y la interpretación, revisión crítica del manuscrito. Dr. Yang: revisión crítica del manuscrito. Dr. Fain: revisión crítica del manuscrito. Dr. Edelstein: participó en las discusiones iniciales sobre el manuscrito y ayudó a desarrollar el primer borrador. Sr. Kumar: análisis de datos estadísticos e interpretación. Dr. Ferry: estudio concepto y diseño, adquisición de datos, la interpretación de los análisis de datos, redacción del manuscrito, supervisión estudio.

#### RECONOCIMIENTO

Los autores agradecen al Dr. David Squillacote, ex empleado de Eisai Inc., que participó en las discusiones iniciales sobre el concepto del manuscrito.

#### FINANCIACIÓN DE ESTUDIO

Apoyo editorial financiado por Eisai Inc. y proporcionado por Sui Generis Salud, LLC, e Imprint Publication Science.

#### BIBLIOGRAFÍA

- French JA. Refractory epilepsy: clinical overview. *Epilepsia* 2007;48:3–7.
- Perucca E, French JA, Bialer M. Development of new antiepileptic drugs: challenges, incentives, and recent advances. *Lancet Neurol* 2007;6:793–804.
- Brodie MJ, Barry SJE, Bamagous GA, Norrie JD, Kwan P. Patterns of treatment response in newly diagnosed epilepsy. *Neurology* 2012;78:1548–1554.
- Rektor I. Perampanel, a novel, non-competitive, selective AMPA receptor antagonist as adjunctive therapy for treatment-resistance partial-onset seizures. *Expert Opin Pharmacother* 2013;14:225–235.
- Rogawski MA, Hanada T. Preclinical pharmacology of perampanel, a selective non-competitive AMPA receptor antagonist. *Acta Neurol Scand Suppl* 2013;197:19–24.
- Fycompa [prescribing information]. Woodcliff Lake, NJ: Eisai Inc.; 2014.
- Fycompa [summary of product characteristics]. Hatfield, UK: Eisai Europe Limited; 2012.
- Fycompa [product monograph]. Mississauga, ON: Eisai Limited; 2013.
- French JA, Krauss GL, Biton V, et al. Adjunctive perampanel for refractory partial-onset seizures: randomized phase III study 304. *Neurology* 2012;79:589–596.
- French JA, Krauss GL, Steinhoff BJ, et al. Evaluation of adjunctive perampanel in patients with refractory partial-onset seizures: results of randomized global phase III study 305. *Epilepsia* 2012;54:117–125.
- Krauss GL, Serratosa JM, Villanueva V, et al. Randomized phase III study 306: adjunctive perampanel for refractory partial-onset seizures. *Neurology* 2012;78:1408–1415.
- Franco V, Crema F, Iudice A, Zaccarad G, Grillo E. Novel treatment options for epilepsy: focus on perampanel. *Pharmacol Res* 2013;70:35–40.
- Gidal BE, Ferry J, Majid O, Hussein Z. Concentration-effect relationships with perampanel in patients with pharmacoresistant partial-onset seizures. *Epilepsia* 2013;54:1490–1497.
- Hussein Z, Critchley D, Ferry J, Laurenza A. Population pharmacokinetics of perampanel, a selective, noncompetitive AMPA receptor antagonist, in patients with refractory partial-onset seizures participating in a randomized, double-blind, placebo-controlled phase III study. Poster presented at the 29th International Epilepsy Congress; August 28–September 1, 2011; Rome.
- Hussein Z, Ferry J, Krauss GL, Squillacote D, Laurenza A. Demographic factors and concomitant antiepileptic drugs have no effect on the pharmacodynamics of perampanel. Poster presented at the 64th Annual Meeting of the American Academy of Neurology; April 21–28, 2012; New Orleans.
- Hsu WW, Sing CW, He Y, Worsley AJ, Wong ICK, Chan EW. Systematic review and meta-analysis of the efficacy and safety of perampanel in the treatment of partial-onset epilepsy *CNS Drugs* 2013;27:817–827.
- Laurenza A, Gidal B, Hussein Z, et al. Evaluation of efficacy and safety of perampanel in the presence of concomitant CYP3A4-inducing AEDs: analyses from the perampanel phase 3 clinical trials. Poster presented at the 66th American Epilepsy Society Annual Meeting; November 30–December 4, 2012; San Diego.
- Steinhoff BJ, Ben-Menachem E, Ryvlin P, et al. Efficacy and safety of adjunctive perampanel for the treatment of refractory partial seizure: a pooled analysis of three phase III studies. *Epilepsia* 2013;54:1481–1489.
- St. Louis EK. Truly “rational” polytherapy: maximizing efficacy and minimizing drug interactions, drug load, and adverse effects. *Curr Neuropharmacol* 2009;7:96–105.
- Gidal BE, French JA, Grossman P, Le Teuff G. Assessment of potential drug interactions in patients with epilepsy: impact of age and sex. *Neurology* 2009;72:419–425.
- Beyenburg S, Stavem K, Schmidt D. Placebo-corrected efficacy of modern nonenzyme-inducing AEDs for refractory focal epilepsy: systematic review and meta-analysis. *Epilepsia* 2012;53:512–520.
- Brodie MJ, Mintzer S, Pack AM, Gidal BE, Vecht CJ, Schmidt D. Enzyme induction with antiepileptic drugs: cause for concern? *Epilepsia* 2013;54:11–27.
- Kramer LD, Satlin A, Krauss GL, et al. Perampanel for adjunctive treatment of partial-onset seizures: a pooled dose-response analysis of phase III studies. *Epilepsia* 2014;55:423–431.
